# Supplementary material
Source: PubMed Central journal article supplement (PMC3068006)
Supplement: supp_WNL.0b013e318214332c_table_e-1.pdf [file supp_WNL.0b013e318214332c_table_e-1.pdf]

table e-1. Demographic, clinical and serological characteristics of the NMO cohort.

| <b>NMO case*</b> | <b>Sex</b> | <b>Age at onset</b> | <b>Disease duration (months)</b> | <b>Clinical Course</b> | <b>Nature of Relapses</b>                   | <b>Cause of death</b> | <b>NMO-IgG status</b> | <b>History of N/V</b>   | <b>AP Lesions</b> |
|------------------|------------|---------------------|----------------------------------|------------------------|---------------------------------------------|-----------------------|-----------------------|-------------------------|-------------------|
| 1                | F          | 39                  | 36                               | Relapsing              | rLETM; ON; ophthalmoplegia; bulbar symptoms | RA                    | +                     | 2 months prior to death | Present           |
| 2                | F          | 12                  | 36                               | Relapsing              | ON; rLETM; encephalopathy + coma            | RA                    | N/A                   | At age 14 prior to LETM | Present           |
| 3                | M          | N/A                 | N/A (age at death 47)            | Relapsing              | rLETM; ON                                   | N/A                   | N/A                   | Not mentioned           | Present           |
| 4                | F          | 49                  | 47                               | Relapsing              | rLETM; bilateral ON                         | RA                    | N/A                   | Not mentioned           | Present           |
| 5                | F          | 27                  | 8                                | Relapsing              | rON; headache; vertigo                      | SAH                   | +                     | At time of death        | Present           |
| 6                | F          | 67                  | 11                               | Relapsing              | ON; rLETM; visual hallucinations            | RA                    | N/A                   | 5 days prior to death   | Present           |
| 7                | F          | 17                  | 66                               | Relapsing              | rLETM; ON                                   | RA                    | N/A                   | Not mentioned           | Absent            |
| 8                | F          | 56                  | 24                               | Relapsing              | rON; rLETM                                  | PE                    | N/A                   | Not mentioned           | Absent            |
| 9                | F          | 45                  | 56                               | Relapsing              | LETM; ON                                    | RA                    | N/A                   | Not mentioned           | Absent            |
| 10               | M          | 41                  | 12                               | Relapsing              | rLETM; rON; encephalopathy                  | RA                    | N/A                   | Not mentioned           | Absent            |
| 11               | F          | 56                  | 108                              | Relapsing              | rLETM; ON; encephalopathy + coma            | RA                    | +                     | Not mentioned           | Absent            |
| 12               | F          | 56                  | 96                               | Relapsing              | rLETM; rON; encephalopathy                  | RA                    | +                     | Not mentioned           | Absent            |

|    |   |    |    |           |                                                                      |    |     |                          |        |
|----|---|----|----|-----------|----------------------------------------------------------------------|----|-----|--------------------------|--------|
| 13 | F | 39 | 21 | Relapsing | Encephalopathy; bulbar symptoms; bilateral ON; ophthalmoplegia; LETM | RA | -   | Prior to initial relapse | Absent |
| 14 | F | 74 | 36 | Relapsing | rLETM                                                                | PU | +   | Not mentioned            | Absent |
| 15 | F | 45 | 27 | Relapsing | rLETM; ON                                                            | RA | N/A | Not mentioned            | Absent |

\*Patients 1 to 6 in table e-1 are the same with patients 1 to 6 in Table 1; N/V = nausea / vomiting; AP = area postrema; rLETM = relapsing longitudinal extensive transverse myelitis; ON = optic neuritis; RA = respiratory arrest; N/A = not available; LETM = longitudinal extensive transverse myelitis; rON = relapsing optic neuritis; SAH = subarachnoid hemorrhage; PE = pulmonary embolism; PU = perforated ulcer.
